# Supplementary material for: Low cost and solution-processable zinc phthalocyanine as alternative hole transport material for perovskite solar cells
Source: Royal Society of Chemistry journal article supplement (doi:10.1039/c6ra22451b), 2016-01-01
Supplement: c6ra22451b1.pdf [file c6ra22451b1.pdf]

## Electronic Supplementary Information (ESI)

### Low cost and solution-processable zinc phthalocyanine as alternative hole transport material for perovskite solar cells

Shufang Wu, Ya Zheng, Qingwei Liu, Renjie Li\* and Tianyou Peng\*

College of Chemistry and Molecular Sciences, Wuhan University, Wuhan 430072, P. R. China

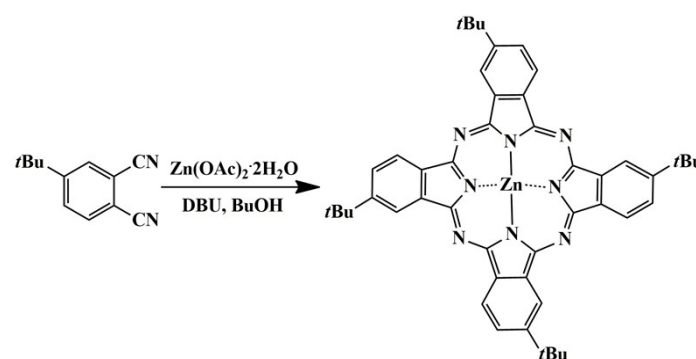

Fig. S1 Synthetic route of ZnPc(tBu)<sub>4</sub>.

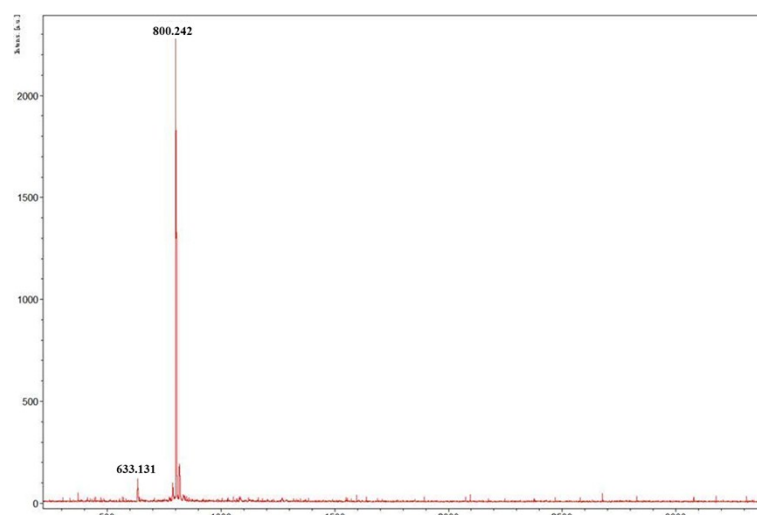

Fig. S2 MALDI-TOF mass spectrum of molecular ion of ZnPc(tBu)<sub>4</sub>.

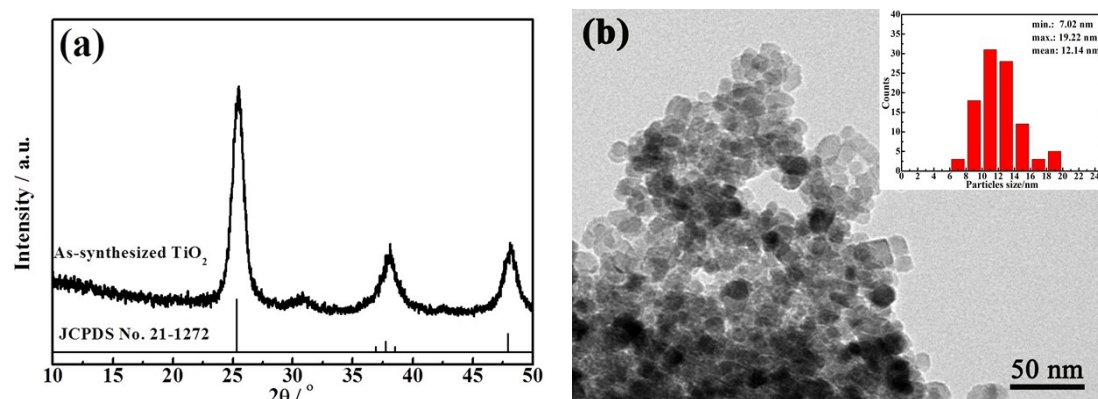

Fig. S3 XRD pattern (a), TEM image (b) and the particle diameter distribution plot (inset) of the synthesized TiO<sub>2</sub> nanoparticles.

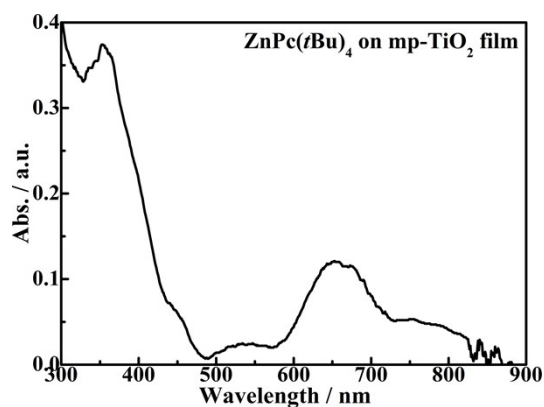

**Fig. S4** UV-vis absorption spectra of  $\text{ZnPc}(t\text{Bu})_4$  on mp- $\text{TiO}_2$  film.

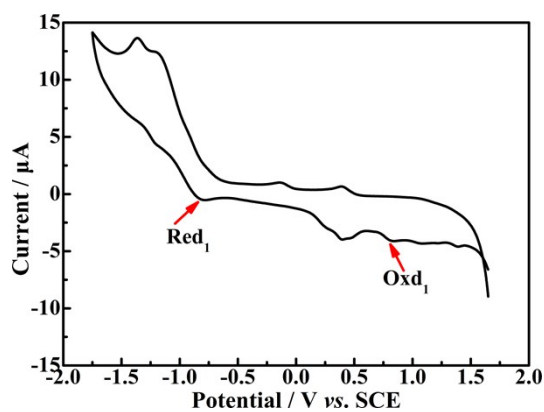

**Fig. S5** Cyclic voltammogram (CV) of  $\text{ZnPc}(t\text{Bu})_4$ .

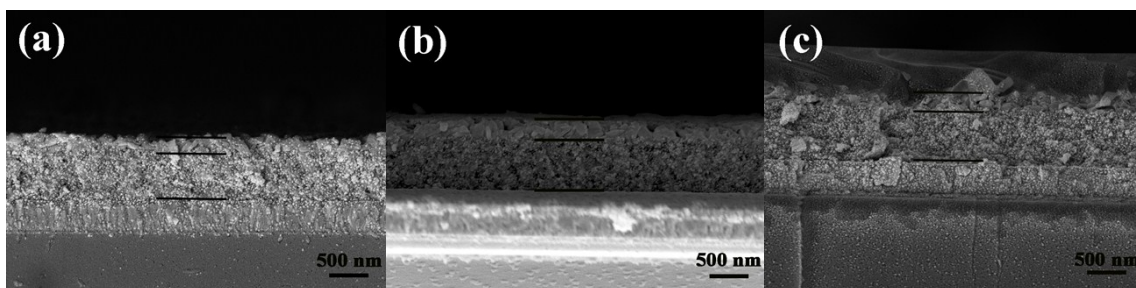

**Fig. S6** FESEM images of FTO/mp- $\text{TiO}_2$ /MAPbI<sub>3</sub>(a), FTO/mp- $\text{TiO}_2$ /MAPbI<sub>3</sub>/ $\text{ZnPc}(t\text{Bu})_4$ (b), and FTO/mp- $\text{TiO}_2$ /MAPbI<sub>3</sub>/spiro-OMeTAD(c).

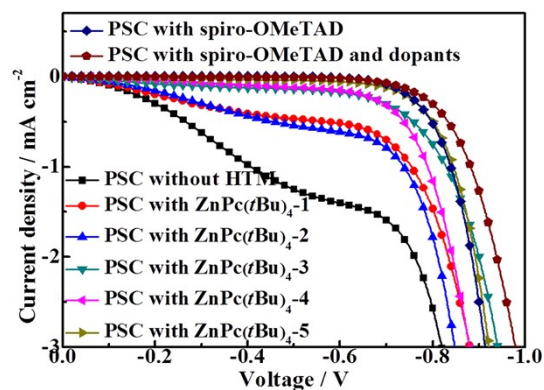

**Fig. S7** Dark current curves of PSCs fabricated with different HTM layers listed in Table 2,  $\text{ZnPc}(t\text{Bu})_4$ -1 to -5 refer to the HTM layer spin-coated with  $2.5 \times 10^{-3}$  M to  $2.5 \times 10^{-2}$  M  $\text{ZnPc}(t\text{Bu})_4$  solution, respectively.

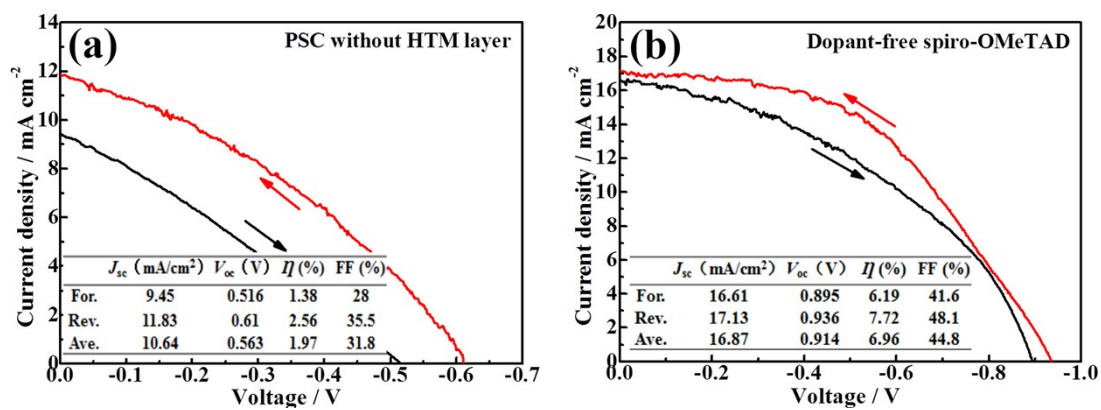

**Fig. S8**  $J$ - $V$  curves of the best-performing PSCs fabricated without HTM layer (a), and the PSC fabricated by spin-coating  $5.9 \times 10^{-2}$  M spiro-OMeTAD as HTM layer (b) under forward (black) and reverse (red) voltage scanning with an active area of  $0.09 \text{ cm}^2$  ( $100 \text{ mW cm}^{-2}$  simulated solar illumination).
